# Supplementary material
Source: PubMed Central journal article supplement (PMC6052201)
Supplement: supp_RA118.002377_135403_1_supp_130259_p80nqc.pdf [file supp_RA118.002377_135403_1_supp_130259_p80nqc.pdf]

**Supplemental Table**

| Gene full name |                                                                         | Primer sequences for real-time QPCR                            |
|----------------|-------------------------------------------------------------------------|----------------------------------------------------------------|
| <i>U36B4</i>   | Ribosomal protein, large, P0                                            | F: 5'AGATGCAGCAGATCCGCA3'<br>R: 5'GTTCTTGCCCATCAGCACCC3'       |
| <i>Prmt5</i>   | Protein arginine methyltransferase 5                                    | F: 5'CTGAATTGCGTCCCCGAAATA3'<br>R: 5'AGGTTCCCTGAATGAACTC CCT3' |
| <i>Ppara</i>   | Peroxisome proliferative activated receptor alpha                       | F: 5'AGAGCCCCATCTGTCCTCTC3'<br>R: 5'ACTGGTAGTCTGCAAAAACCAA3'   |
| <i>Pgc-1α</i>  | Peroxisome proliferative activated receptor, gamma, coactivator 1 alpha | F: 5'AACCACACCCACAGGATCAGA3'<br>R: 5'TCTTCGCTTTATTGCTCCATGA3'  |
| <i>Cox7a1</i>  | cytochrome c oxidase subunit VIIa 1                                     | F: 5'CAGCGTCATGGTCAGTCTGT 3'<br>R: 5'AGAAAACCGTGTGGCAGAGA3'    |
| <i>CytoC</i>   | cytochrome P450, family 2, subfamily d, polypeptide 12                  | F: 5'CCCATCTTTGAGCATCTTGGT3'<br>R: 5'GCCCAGCCTGAGTAGTGAAG3'    |
